# Supplementary material for: Interferon-Induced Ifit2/ISG54 Protects Mice from Lethal VSV Neuropathogenesis
Source: PubMed Central journal article supplement (PMC3355090; doi:10.1371/journal.ppat.1002712), 2012-05-17
Supplement: ppat.1002712.s001.pdf [file ppat.1002712.s001.pdf]

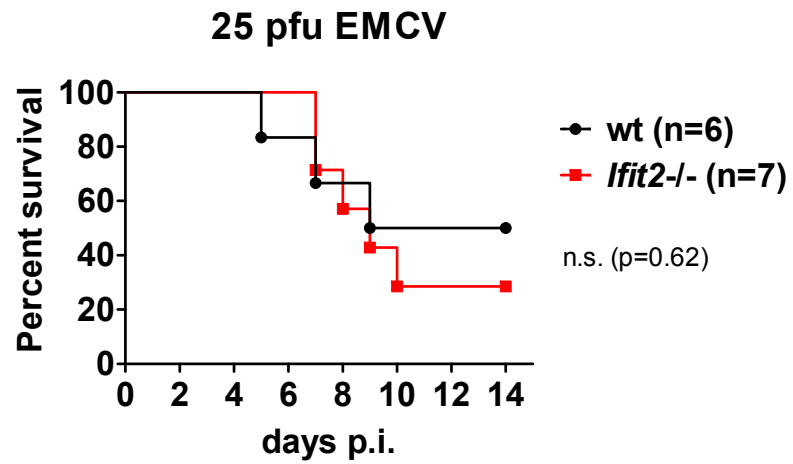

**Figure S1. Survival of wt and *Ifit2*<sup>-/-</sup> mice after infection with low EMCV dose (25 pfu).** Statistical significance of survival differences is indicated by p-value; n.s., not significant.
