# Supplementary material for: Interferon-Induced Ifit2/ISG54 Protects Mice from Lethal VSV Neuropathogenesis
Source: PubMed Central journal article supplement (PMC3355090; doi:10.1371/journal.ppat.1002712), 2012-05-17
Supplement: ppat.1002712.s002.pdf [file ppat.1002712.s002.pdf]

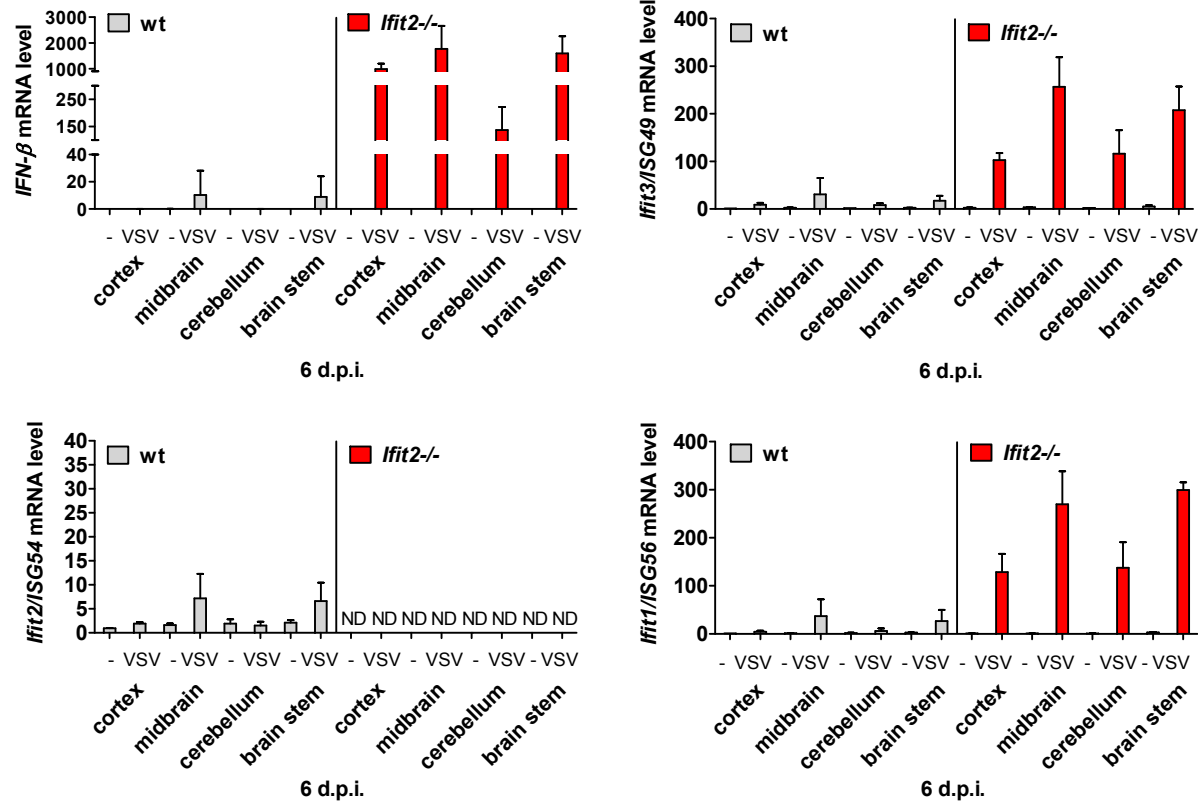

**Figure S2. Enhanced ISG and *IFN-β* induction in intranasally VSV-infected *Ifit2*<sup>-/-</sup> brain regions.** *IFN-β*, and *Ifit3/2/1* mRNA levels in different regions of brains of uninfected or VSV-infected wt and *Ifit2*<sup>-/-</sup> mice at 6 d.p.i., plotted as mean+SD. n=4 mice per infected group; ND, not done. Infections were intranasal with  $4 \times 10^2$  pfu of VSV.
