# Supplementary material for: Interferon-Induced Ifit2/ISG54 Protects Mice from Lethal VSV Neuropathogenesis
Source: PubMed Central journal article supplement (PMC3355090; doi:10.1371/journal.ppat.1002712), 2012-05-17
Supplement: ppat.1002712.s003.pdf [file ppat.1002712.s003.pdf]

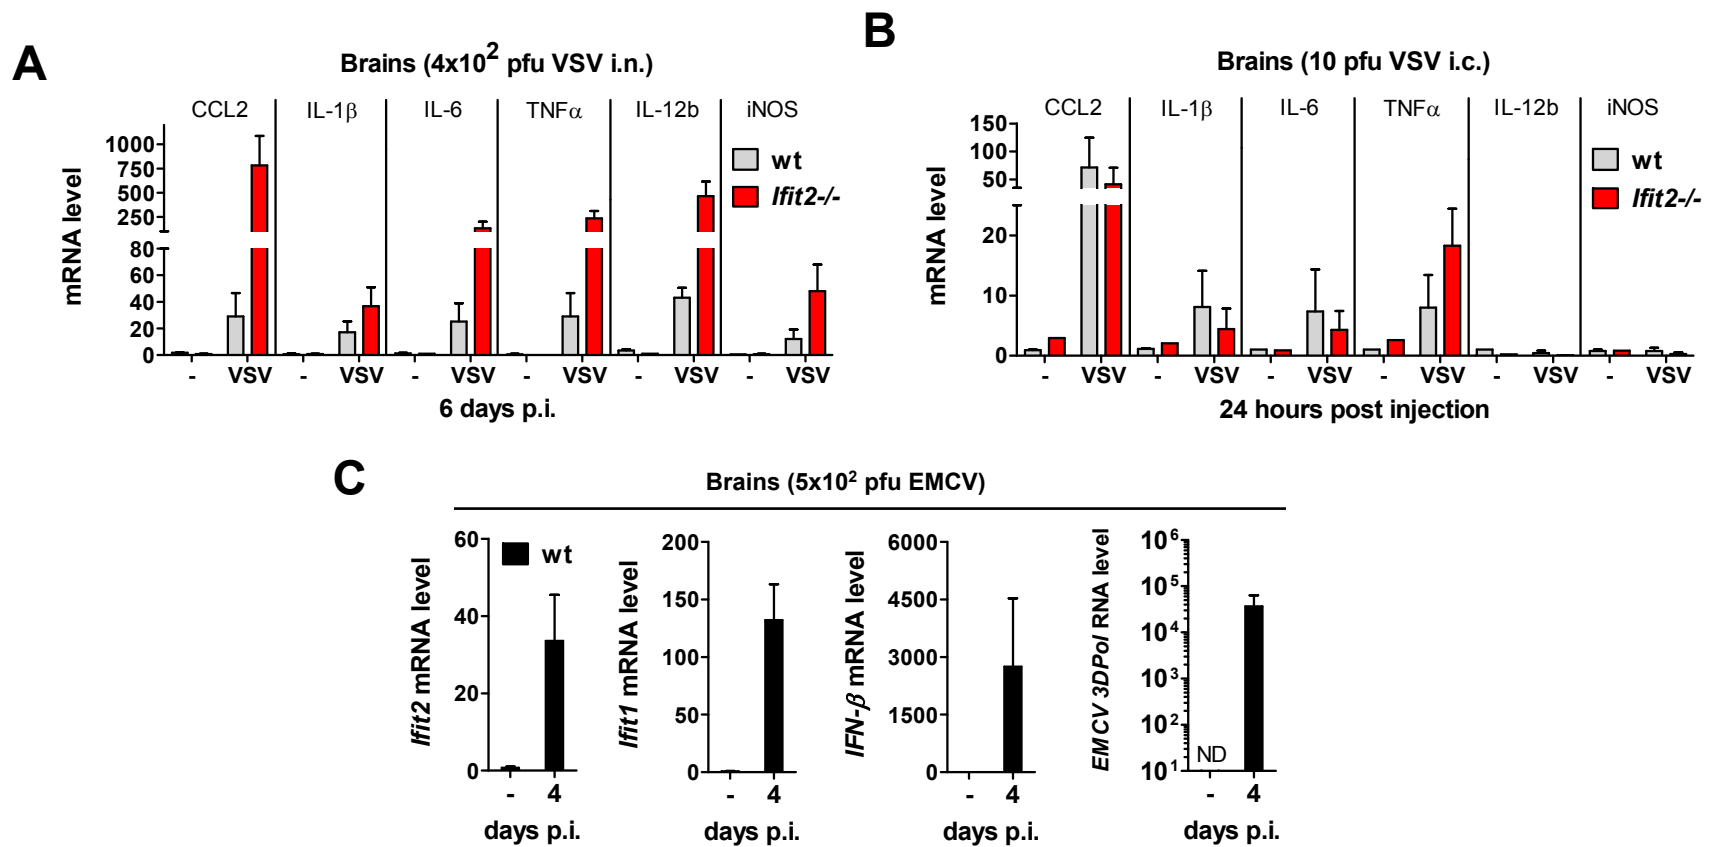

**Figure S3. Gene induction in brains after VSV or EMCV infections.** **A**, mRNA levels of select genes in brains (without OBs) of uninfected or intranasally VSV-infected wt and *Ifit2*<sup>-/-</sup> mice at 6 d.p.i., plotted as mean+SD; n=3 mice per infected group; infection was intranasal with  $4 \times 10^2$  pfu of VSV **B**, mRNA levels of select genes in brains (without OBs) of uninfected or intracranially VSV-infected wt and *Ifit2*<sup>-/-</sup> mice at 24 h post injection, plotted as mean+SD; n=4 mice per infected group; infection was intracranial injection with 10 pfu of VSV. **C**, *Ifit2*, *Ifit1*, *IFN- $\beta$*  and EMCV RNA levels in brains 4 days after EMCV infection ( $5 \times 10^2$  pfu, n=3 mice per infected group).
