# Supplementary material for: Interferon-Induced Ifit2/ISG54 Protects Mice from Lethal VSV Neuropathogenesis
Source: PubMed Central journal article supplement (PMC3355090; doi:10.1371/journal.ppat.1002712), 2012-05-17
Supplement: ppat.1002712.s004.pdf [file ppat.1002712.s004.pdf]

**cortex (100x)**

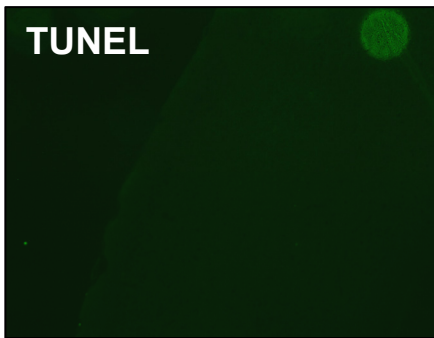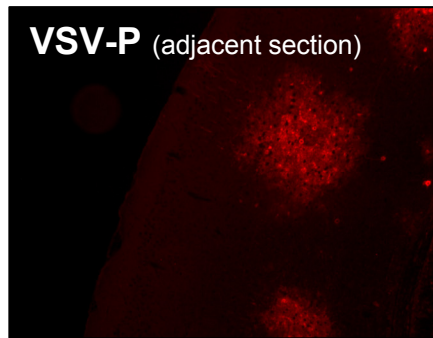

**hippocampus (100x)**

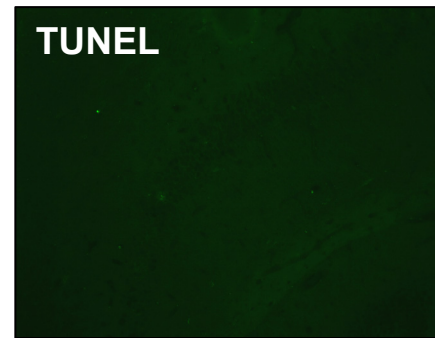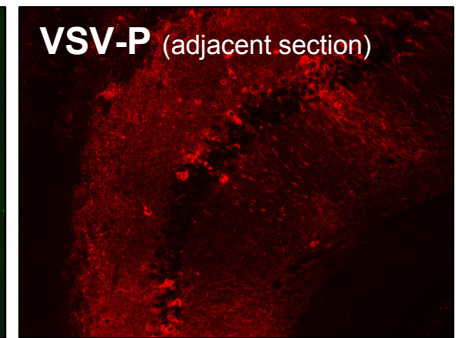

**ventral striatum (200x)**

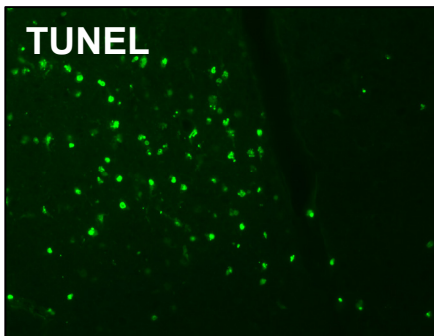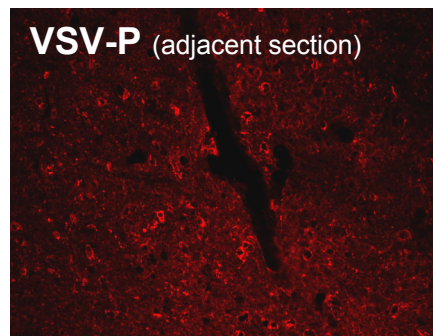

**at 4<sup>th</sup> ventricle (200x)**

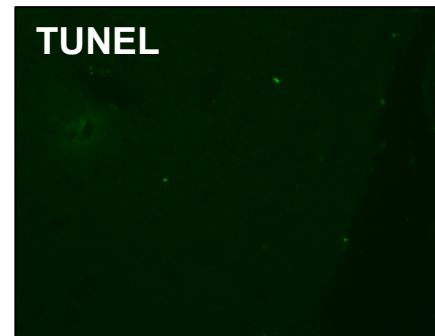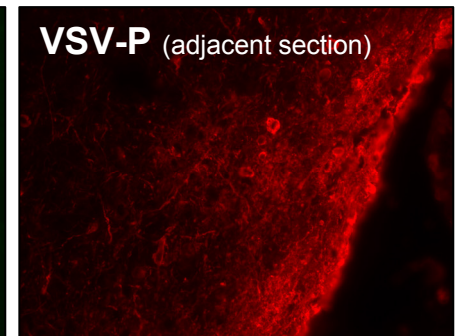

**brain stem (200x)**

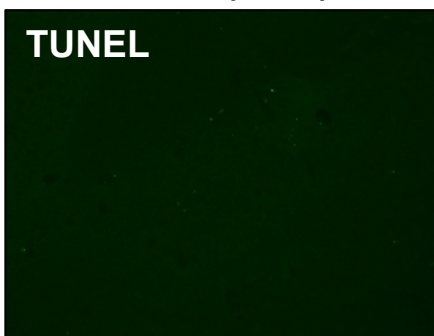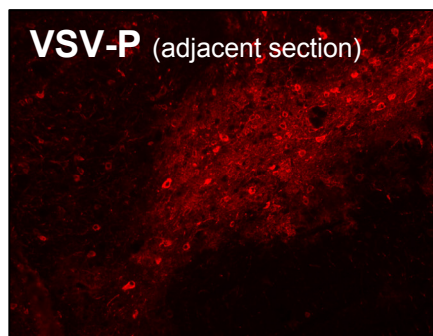

**Figure S4. Region-selective induction of apoptosis in brains of intranasally VSV-infected *Ifit2*<sup>-/-</sup> mice.** *Ifit2*<sup>-/-</sup> mice were i.n. infected with  $4 \times 10^2$  pfu of VSV; at 6 d.p.i., adjacent sections of fixed brains were labeled to detect apoptotic cells (TUNEL) or VSV P protein (immunohisto-fluorescence), n=2 mice; only few regions such as striatum show positive TUNEL; infected wt brains and uninfected control brains of either genotype did not show appreciable signals, hence data not shown).
