# Supplementary material for: Interferon-Induced Ifit2/ISG54 Protects Mice from Lethal VSV Neuropathogenesis
Source: PubMed Central journal article supplement (PMC3355090; doi:10.1371/journal.ppat.1002712), 2012-05-17
Supplement: ppat.1002712.s005.pdf [file ppat.1002712.s005.pdf]

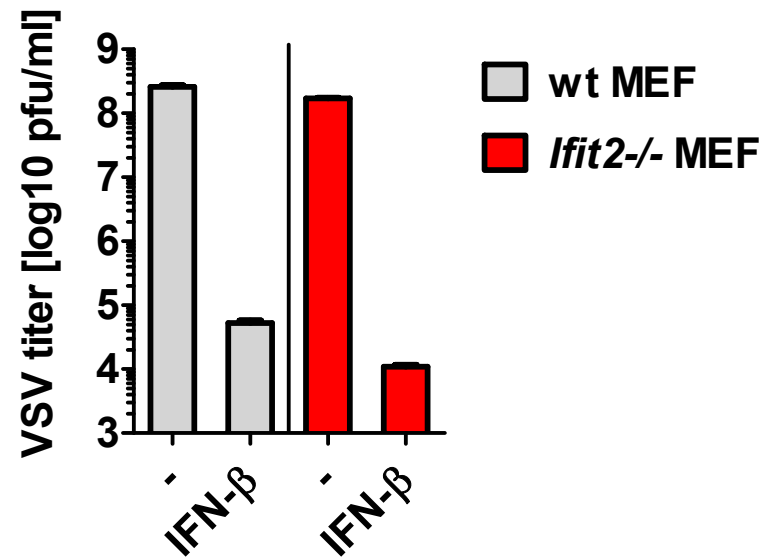

**Figure S5. VSV yields from infected wt and *Ifit2*<sup>-/-</sup> MEF.** Immortalized MEF were treated for 16 h with 10 U/ml IFN-β and infected with VSV at moi 10. 12 hours after infection, virus yields were determined by plaque assay. Results are plotted as mean+SD on log scale, representing one of two independent experiments.
