# Supplementary material for: Interferon-Induced Ifit2/ISG54 Protects Mice from Lethal VSV Neuropathogenesis
Source: PubMed Central journal article supplement (PMC3355090; doi:10.1371/journal.ppat.1002712), 2012-05-17
Supplement: ppat.1002712.s006.pdf [file ppat.1002712.s006.pdf]

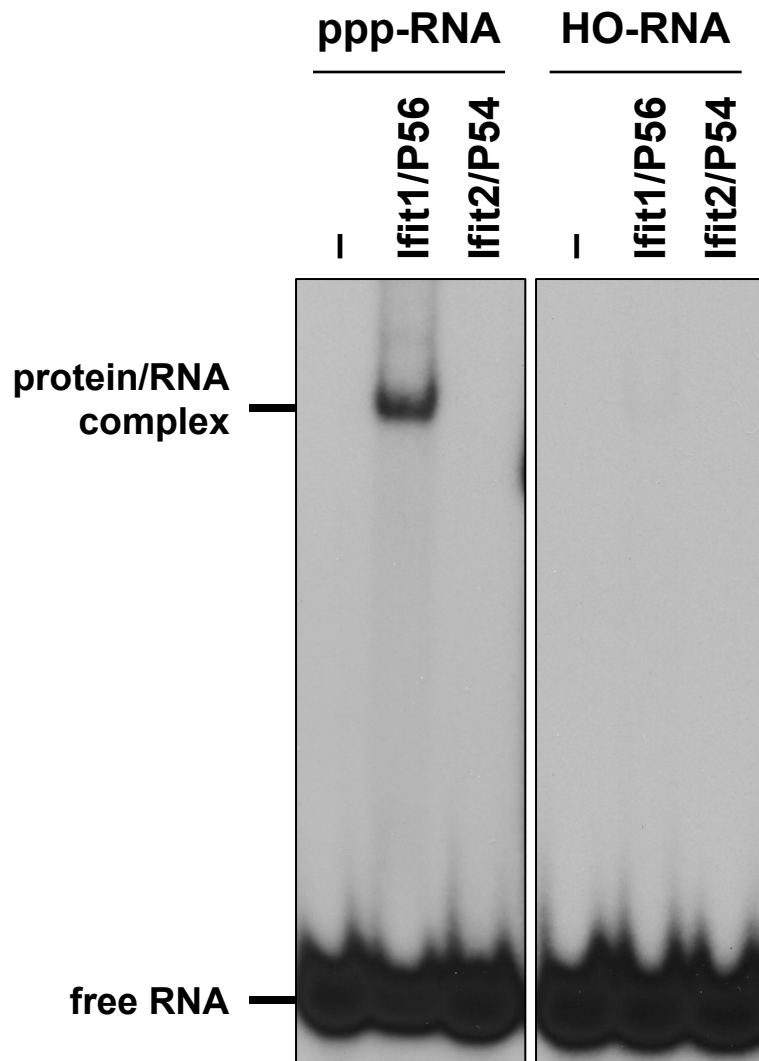

**Figure S6. Murine Ifit2 protein does not bind ppp-RNA.** Single-stranded radiolabeled VSV leader RNAs (nt 1-18) with either 5'-triphosphorylated or free 5'-hydroxyl-ends (ppp-RNA or HO-RNA) were *in vitro* incubated with purified murine Ifit1 (= P56) or Ifit2 (= P54) proteins; formation of protein/RNA complex was detected by electrophoretic mobility shift assay.
