# Supplementary material for: Interferon-Induced Ifit2/ISG54 Protects Mice from Lethal VSV Neuropathogenesis
Source: PubMed Central journal article supplement (PMC3355090; doi:10.1371/journal.ppat.1002712), 2012-05-17
Supplement: ppat.1002712.s007.pdf [file ppat.1002712.s007.pdf]

**Table S1: Enhanced gene expression in brains incl. OBs of intranasally VSV-infected *Ifit2*<sup>-/-</sup> versus wt mice at 6 d.p.i.**

| Gene symbol               | Fold expression in <i>Ifit2</i> <sup>-/-</sup> over wt (6 d.p.i.) | Fold expression in <i>Ifit2</i> <sup>-/-</sup> over wt (2 d.p.i.) | Definition                                                                    |
|---------------------------|-------------------------------------------------------------------|-------------------------------------------------------------------|-------------------------------------------------------------------------------|
| <i>Ifnb1</i>              | 77.2                                                              | 5.2                                                               | interferon beta 1, fibroblast ( <i>Ifnb1</i> ).                               |
| <i>Isg20</i>              | 14.2                                                              | 1.7                                                               | interferon-stimulated protein ( <i>Isg20</i> ).                               |
| <i>Ddx3y</i>              | 12.4                                                              | 1.3                                                               | DEAD (Asp-Glu-Ala-Asp) box polypeptide 3, Y-linked ( <i>Ddx3y</i> ).          |
| <i>Saa3</i>               | 8.2                                                               | 0.7                                                               | serum amyloid A 3 ( <i>Saa3</i> ).                                            |
| <i>Ccl2</i>               | 7.4                                                               | 4.9                                                               | chemokine (C-C motif) ligand 2 ( <i>Ccl2</i> ).                               |
| <i>Lcn2</i>               | 6.7                                                               | 1.6                                                               | lipocalin 2 ( <i>Lcn2</i> ).                                                  |
| <i>Slpi</i>               | 6.6                                                               | 1.2                                                               | secretory leukocyte peptidase inhibitor ( <i>Slpi</i> ).                      |
| <i>Arg1</i>               | 6.0                                                               | 0.2                                                               | arginase 1, liver ( <i>Arg1</i> ).                                            |
| <i>Bst2</i>               | 5.9                                                               | 0.9                                                               | bone marrow stromal cell antigen 2 ( <i>Bst2</i> ).                           |
| <i>Cfb</i>                | 5.8                                                               | 19.7                                                              | complement factor B ( <i>Cfb</i> ).                                           |
| <i>Hmox1</i>              | 5.5                                                               | 1.0                                                               | heme oxygenase (decycling) 1 ( <i>Hmox1</i> ).                                |
| <i>Cxcl1</i>              | 4.8                                                               | 1.1                                                               | chemokine (C-X-C motif) ligand 1 ( <i>Cxcl1</i> ).                            |
| <i>Gpnmb</i>              | 4.7                                                               | 1.0                                                               | glycoprotein (transmembrane) nmb ( <i>Gpnmb</i> ).                            |
| <i>Mt2</i>                | 4.5                                                               | 0.8                                                               | metallothionein 2 ( <i>Mt2</i> ).                                             |
| <i>Hspb1</i>              | 4.3                                                               | 3.5                                                               | heat shock protein 1 ( <i>Hspb1</i> ).                                        |
| <i>Chi3l3</i>             | 4.2                                                               | -0.4                                                              | chitinase 3-like 3 ( <i>Chi3l3</i> ).                                         |
| <i>Cdkn1a</i>             | 4.1                                                               | 1.4                                                               | cyclin-dependent kinase inhibitor 1A (P21) ( <i>Cdkn1a</i> ).                 |
| <i>Mx1</i>                | 4.1                                                               | 0.9                                                               | myxovirus (influenza virus) resistance 1 ( <i>Mx1</i> ).                      |
| <i>Ecm1</i>               | 4.1                                                               | 1.4                                                               | extracellular matrix protein 1 ( <i>Ecm1</i> ).                               |
| <i>Rhoj</i>               | 4.0                                                               | 1.3                                                               | ras homolog gene family, member J ( <i>Rhoj</i> ).                            |
| <i>Tyki</i>               | 4.0                                                               | 1.5                                                               | thymidylate kinase LPS-inducible member                                       |
| <i>Ptpre</i>              | 4.0                                                               | 4.1                                                               | protein tyrosine phosphatase, receptor type, E ( <i>Ptpre</i> ).              |
| <b><i>Ifit3/ISG49</i></b> | <b>3.9</b>                                                        | 1.2                                                               | interferon-induced protein with tetratricopeptide repeats 3 ( <i>Ifit3</i> ). |
| <i>Srgn</i>               | 3.8                                                               | 3.3                                                               | serglycin ( <i>Srgn</i> ).                                                    |
| <i>Gbp6</i>               | 3.6                                                               | 0.7                                                               | guanylate binding protein 6 ( <i>Gbp6</i> ).                                  |
| <i>Cdkn1a</i>             | 3.6                                                               | 0.7                                                               | cyclin-dependent kinase inhibitor 1A (P21) ( <i>Cdkn1a</i> ).                 |
| <i>Sct</i>                | 3.6                                                               | 0.7                                                               | secretin ( <i>Sct</i> ).                                                      |
| <i>Csf1</i>               | 3.4                                                               | 1.0                                                               | colony stimulating factor 1 (macrophage) ( <i>Csf1</i> ).                     |
| <i>Lgals9</i>             | 3.4                                                               | 1.5                                                               | lectin, galactose binding, soluble 9 ( <i>Lgals9</i> ).                       |
| <i>H2-Q8</i>              | 3.4                                                               | 1.5                                                               | histocompatibility 2, Q region locus 8 ( <i>H2-Q8</i> ).                      |
| <i>Gadd45b</i>            | 3.4                                                               | 1.4                                                               | growth arrest and DNA-damage-inducible 45 beta ( <i>Gadd45b</i> ).            |
| <i>H2-T23</i>             | 3.4                                                               | 1.0                                                               | histocompatibility 2, T region locus 23 ( <i>H2-T23</i> ).                    |
| <i>Rsad2</i>              | 3.3                                                               | 0.6                                                               | radical S-adenosyl methionine domain containing 2 ( <i>Rsad2</i> ).           |
| <i>Stat2</i>              | 3.3                                                               | 0.9                                                               | signal transducer and activator of transcription 2 ( <i>Stat2</i> ).          |
| <i>Map1lc3b</i>           | 3.3                                                               | 3.3                                                               | microtubule-associated protein 1 light chain 3 beta ( <i>Map1lc3b</i> ).      |
| <i>Cyp1b1</i>             | 3.2                                                               | 1.3                                                               | cytochrome P450, family 1, subfamily b, polypeptide 1 ( <i>Cyp1b1</i> ).      |
| <i>Oasl1</i>              | 3.2                                                               | 1.0                                                               | 2'-5' oligoadenylate synthetase-like 1 ( <i>Oasl1</i> ).                      |
| <i>Ctss</i>               | 3.2                                                               | 1.2                                                               | cathepsin S ( <i>Ctss</i> ).                                                  |
| <i>Trim56</i>             | 3.2                                                               | 1.2                                                               | tripartite motif-containing 56 ( <i>Trim56</i> ).                             |
| <i>Ube2l6</i>             | 3.2                                                               | 0.7                                                               | ubiquitin-conjugating enzyme E2L 6 ( <i>Ube2l6</i> ).                         |
| <i>S3-12</i>              | 3.2                                                               | 1.3                                                               | plasma membrane associated protein, S3-12 ( <i>S3-12</i> ).                   |
| <i>Ccl7</i>               | 3.1                                                               | 1.3                                                               | chemokine (C-C motif) ligand 7 ( <i>Ccl7</i> ).                               |
| <i>Usp18</i>              | 3.1                                                               | 0.5                                                               | ubiquitin specific peptidase 18 ( <i>Usp18</i> ).                             |
| <i>Spp1</i>               | 3.1                                                               | 1.0                                                               | secreted phosphoprotein 1 ( <i>Spp1</i> ).                                    |
| <i>Cdkn1a</i>             | 3.0                                                               | 1.0                                                               | cyclin-dependent kinase inhibitor 1A (P21) ( <i>Cdkn1a</i> ).                 |
| <i>Oasl1</i>              | 3.0                                                               | 1.0                                                               | 2'-5' oligoadenylate synthetase-like 1 ( <i>Oasl1</i> ).                      |
| <i>Timp1</i>              | 3.0                                                               | 0.5                                                               | tissue inhibitor of metalloproteinase 1                                       |
| <i>Lrg1</i>               | 3.0                                                               | 1.5                                                               | leucine-rich alpha-2-glycoprotein 1 ( <i>Lrg1</i> ).                          |
| <i>Zfp313</i>             | 3.0                                                               | 1.7                                                               | ring finger protein 114 ( <i>Rnf114</i> ).                                    |
| <i>Mgst1</i>              | 3.0                                                               | 1.7                                                               | microsomal glutathione S-transferase 1 ( <i>Mgst1</i> ).                      |
| <i>Ifi27</i>              | 3.0                                                               | 1.1                                                               | interferon, alpha-inducible protein 27 ( <i>Ifi27</i> ).                      |

Wt or *Ifit2*<sup>-/-</sup> mice were intranasally VSV-infected with 4x10<sup>2</sup> pfu, and at 2 or 6 d.p.i., brain (incl. OB) RNA expression profiles were obtained by microarray. Genes are ranked by their "fold expression level in *Ifit2*<sup>-/-</sup> over wt at 6 d.p.i.". Only genes with at least 3-fold higher expression level in *Ifit2*<sup>-/-</sup> are included. Note: The *Ifit1/ISG56* probe of the Illumina mouse Ref-8 chip is defective and therefore the gene is not included in this list.
